# Supplementary material for: Hierarchically structured catalyst layer for the oxygen reduction reaction fabricated by electrodeposition of platinum on carbon nanotube coated carbon fiber
Source: Royal Society of Chemistry journal article supplement (doi:10.1039/c5ra13866c), 2015-01-01
Supplement: c5ra13866c1.pdf [file c5ra13866c1.pdf]

## Supplementary information on Platinum nanoparticles supported on carbon nanotube coated carbon fiber as hierarchically structured catalyst layer for oxygen reduction reaction

### 1. Selection of parameters for electrodeposition

Present study is focused more on the effects of cluster size and loading of Pt on the ORR activity. The parameters for electrodeposition ( $\text{H}_2\text{PtCl}_6$  concentration and potential) were selected so that the Pt-loading with time varies gradually. For example, large platinum particles were obtained for electrodeposition at -3 V (Fig. S1), which possibly may not be interesting due to high Pt-loading.

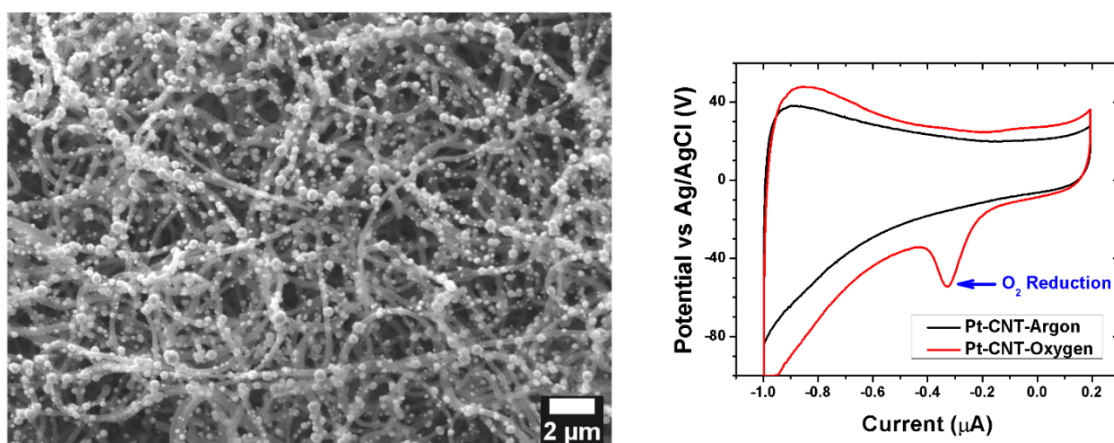

**Fig. S1:** SEM image and cyclic voltammetry of Pt-CNTCF electrodeposited at -3 V for electrodeposition time of 20 min.

### 2. Elemental analysis of Pt/CNTCF

EDX spectra of platinum coated CNTCF (Pt/CNTCF) samples synthesized at different electrodeposition times ( $t_{ed}$ ) are shown in Fig. S2. With increasing  $t_{ed}$ , the fractional weight of Pt increases significantly.

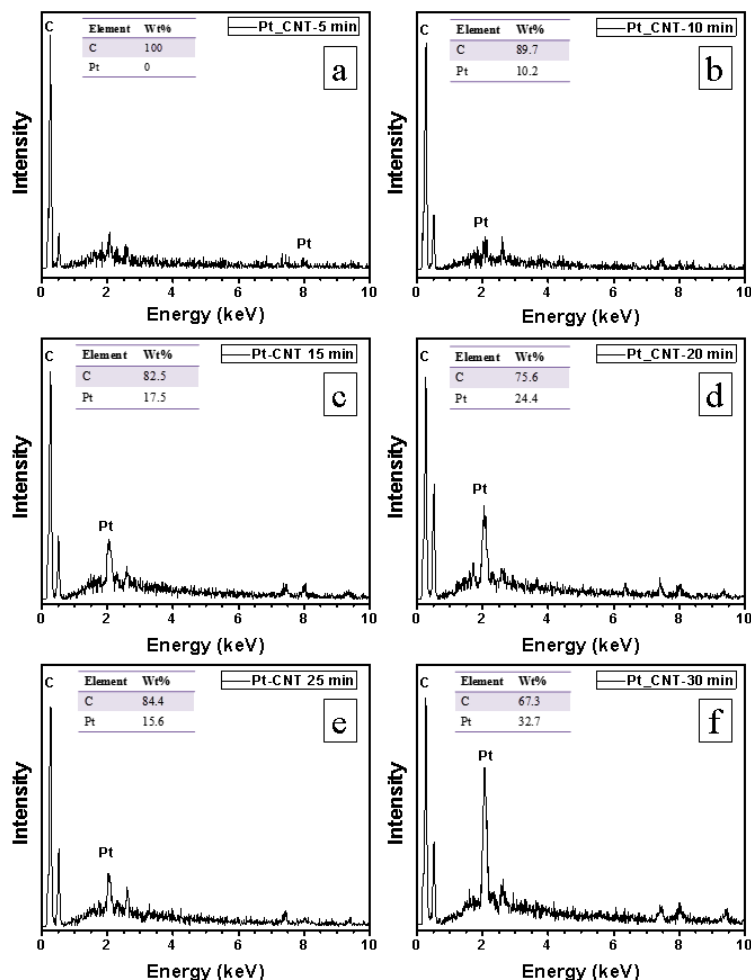

**Fig. S2:** EDX spectra of Pt/CNTCF synthesized with varying  $t_{ed}$ .

### 3. Determination of Pt-cluster size distribution:

Fig. S3 shows the SEM images and Pt-Cluster size distribution histograms of Pt/CNTCF for varying  $t_{ed}$  from 5 to 30 min. A red circle in the image shows the approximate size of the corresponding particle. With increasing  $t_{ed}$ , both the  $\phi$  coverage as well as the Pt-cluster size increase significantly. This leads to formation of large clusters for  $t_{ed}$  above 15 min. The variations of cluster size and % area coverage with  $t_{ed}$  are shown in table S1. The %coverage was calculated by analyzing three images for each sample. However, the average cluster size data include large number of particles from a single image, which makes them statistically more reliable.

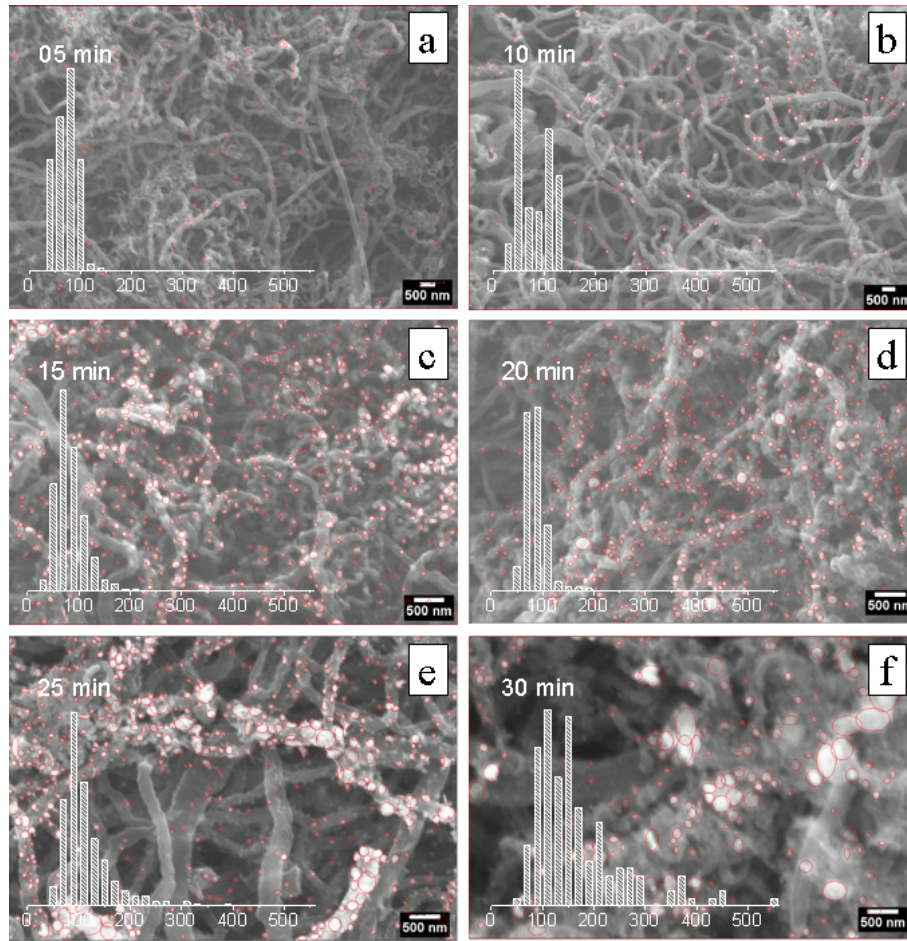

**Fig. S3:** SEM images and Pt-Cluster size distribution histograms of Pt/CNTCF for  $t_{ed}$  of (a) 05, (b) 10, (c) 15, (d) 20, (e) 25 and (f) 30 min. The Pt-particles are approximated to circles/ellipses.

**Table S1:** Variations of average Pt-cluster size and % area covered by Pt-nanoparticles with the deposition time  $t_{ed}$ .

| $t_{ed}$<br>(min) | Pt loading<br>( $\mu\text{g cm}^{-2}$ ) | Cluster size<br>(nm) | St. deviation<br>(nm) | Area coverage<br>(%) | St. deviation<br>(nm) |
|-------------------|-----------------------------------------|----------------------|-----------------------|----------------------|-----------------------|
| 5                 | 3.8                                     | 71.4                 | 18.8                  | 0.5                  | 0.1                   |
| 10                | 5.5                                     | 81.7                 | 32.5                  | 2.3                  | 2.1                   |
| 15                | 9.3                                     | 83.0                 | 28.0                  | 10.9                 | 0.7                   |
| 20                | 11.7                                    | 85.7                 | 22.8                  | 11.6                 | 3.8                   |
| 25                | 14.3                                    | 112.9                | 46.9                  | 15.5                 | 1.5                   |
| 30                | 15.7                                    | 166.7                | 86.1                  | 15.3                 | 4.0                   |

#### 4. Copper underpotential deposition (Cu upd) on Pt-CNTCF

Cu upd was also performed to estimate the electrochemical surface area of Pt-CNTCF. However, the CNTCF itself exhibits Cu stripping peak at a potential almost similar to that for Pt (Fig. S4).

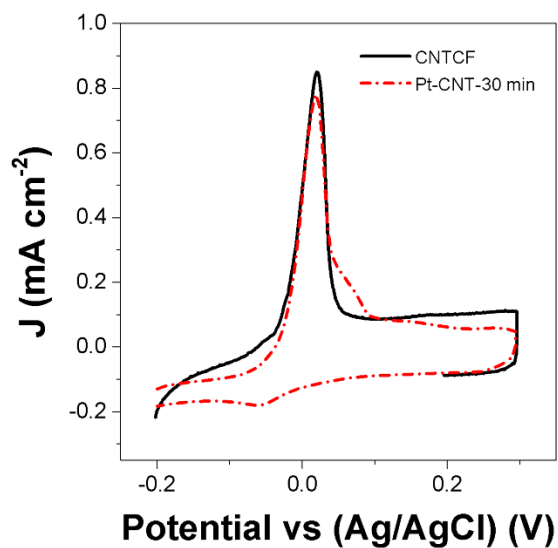

**Fig. S4:** Cu upd for CNTCF and Pt-CNTCF-30 min performed at a scan rate of 2 mV s<sup>-1</sup> after holding at -0.2 V for 100 s in an electrolyte consisting of 0.1 M H<sub>2</sub>SO<sub>4</sub> and 2 mM CuSO<sub>4</sub>.

#### 5. Cyclic voltammetry in Ar saturated electrolyte

CV scans for Ar saturated 0.1 M KOH electrolyte shown in Fig. S5 exhibit no cathodic peak at ~ 0.4 V. The disappearance of the peak in absence of oxygen confirms its origin to be the oxygen reduction reaction.

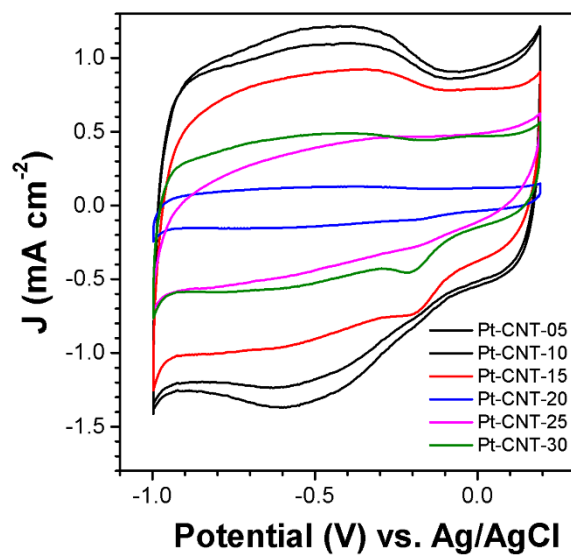

**Fig. S5:** CV scans of Pt/CNTCF in Ar saturated 0.1 M KOH at a scan rate of 50 mV s<sup>-1</sup>.
